# Supplementary material
Source: MDPI journal article supplement (https://www.mdpi.com/2311-7524/10/5/444)
Supplement: s1 [file s1]

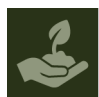

## Article

# Supplementary Materials: Using mutation breeding to improve the eating characteristics of the Fusarium wilt resistant banana variety, ‘Goldfinger’ (AAAB)

Katelyn Robertson, Sharon Hamill, Carole Wright, Massimo Bianco, Ashley Balsom, Simoné Moller, Ishita Pramanik, Philippa Lyons and Jeff Daniells

**Table S1.** Definition of sensory attributes used to describe bananas in the Phase II taste-testing surveys.

| Descriptors  | Definition                                                                                                                                    |
|--------------|-----------------------------------------------------------------------------------------------------------------------------------------------|
| Sweet        | Sugary                                                                                                                                        |
| Tart         | A sour, slightly acidic taste                                                                                                                 |
| Firm         | The force required to compress a sample between teeth                                                                                         |
| Creamy       | Smooth, tender pulp that is of an even consistency and ‘melts’ as it is chewed. A soft texture but not mushy, slimy, sticky or mealy (gritty) |
| Mucilaginous | A sticky, slimy texture                                                                                                                       |
| Ripeness     | The optimal taste and texture characteristics for eating                                                                                      |
| Flavour      | Banana flavour and intensity                                                                                                                  |
| Aftertaste   | The taste remaining in the mouth after swallowing                                                                                             |

**Table S2.** The 26 sensory attributes developed and defined by the trained sensory panel of 11 assessors. The anchors were used to rate each sample on a 0–100 unstructured line scale.

|                          | Descriptors                     | Definition                                                                           | Anchors       |
|--------------------------|---------------------------------|--------------------------------------------------------------------------------------|---------------|
| Appearance               | Uniformity of colour (cut side) | Even colour = high uniformity,<br>Patchy colour = low uniformity                     | Low to high   |
|                          | Shape (cut side)                | Round to oval                                                                        | Round to oval |
|                          | Moistness (cut side)            | Matte appearance = dry<br>Shiny/ glossy/ glittery appearance = moist                 | Low to high   |
| Aroma                    | Overall aroma Intensity         | Overall aroma intensity                                                              | Low to high   |
|                          | Confectionery                   | Aroma of isoamyl acetate (pear drops)                                                | None to high  |
|                          | Tropical fruit                  | Aroma associated with tropical fruits (pineapple, mango)                             | None to high  |
|                          | Citrus                          | Aroma of citrus fruit juice (lemon, lime)                                            | None to high  |
|                          | Sappy/ resin                    | Aroma of fresh cut grass                                                             | None to high  |
|                          | Musty                           | Aroma of damp earth                                                                  | None to high  |
|                          | Perfumed                        | Aroma of floral perfume                                                              | None to high  |
|                          | Chemical                        | Potent aroma of ethanol in cleaning chemicals                                        | None to high  |
| Texture                  | Firmness                        | Force required to compress a sample between front teeth                              | Low to high   |
|                          | Lumpy                           | Consisting of lumpy pieces that do not break down/disintegrate during mastication    | Low to high   |
|                          | Chalky                          | Chalky mouthfeel                                                                     | Low to high   |
|                          | Gritty                          | Consisting of rough particles present in the mouth during mastication                | Low to high   |
| Flavour                  | Overall Flavour Intensity       | Overall flavour intensity                                                            | Low to high   |
|                          | Sweetness                       | Basic taste                                                                          | None to high  |
|                          | Confectionery                   | Aroma of isoamyl acetate (pear drops)                                                | None to high  |
|                          | Sour                            | Basic taste                                                                          | None to high  |
|                          | Bitter                          | Basic taste                                                                          | None to high  |
|                          | Fruity                          | Flavours of apple and green melon                                                    | None to high  |
|                          | Sappy/ resin                    | Flavour of volatiles from fresh cut grass                                            | None to high  |
|                          | Chemical                        | Potent flavour of volatiles from ethanol in cleaning chemicals products, ether, soap | None to high  |
|                          | Starchy                         | Flavour of potato and other potato-based starchy foods                               | None to high  |
| Aftertaste/<br>Afterfeel | Astringency                     | Drying/puckering in the mouth                                                        | Low to high   |
|                          | Mouth coating                   | The presence of creamy/oily residue after swallowing                                 | Low to high   |

**Table S3.** The plant crop, first and second ratoon agronomic performance of the top 20 Goldfinger Mutant Selections (GMS). Significant differences to Goldfinger ( $\alpha = 0.05$ ) are depicted by the symbol \*. The first and second ratoon data was collected after the plant crop had been nurse-suckered.

| Variant              | Planting to harvest (months) | Bunch wt <sup>1</sup> (kg) | Bunch wt/12 months <sup>2,3,4</sup> | Pseudostem height (m) | Height: Circum. ratio | Fingers/ bunch | 3rd hand finger length (cm) |
|----------------------|------------------------------|----------------------------|-------------------------------------|-----------------------|-----------------------|----------------|-----------------------------|
| <b>Plant Crop</b>    |                              |                            |                                     |                       |                       |                |                             |
| <b>Goldfinger</b>    | <b>12.2</b>                  | <b>27.3</b>                | <b>27.0</b>                         | <b>3.1</b>            | <b>4.2</b>            | <b>129</b>     | <b>24.0</b>                 |
| GMS 144              | 12.4                         | 23.0                       | 22.3*                               | 2.8                   | 4.4                   | 132            | 20.8*                       |
| GMS 211              | 13.9*                        | 21.8*                      | 18.9*                               | 3.2                   | 4.3                   | 125            | 18.7*                       |
| GMS 521              | 13.2*                        | 28.2                       | 25.7                                | 2.9                   | 4.2                   | 138            | 20.8*                       |
| GMS 544              | 12.1                         | 24.7                       | 24.5                                | 3.0                   | 4.4                   | 139            | 20.6*                       |
| GMS 903              | 12.1                         | 27.5                       | 27.3                                | 2.9                   | 4.0                   | 153*           | 21.6*                       |
| GMS 119              | 12.4                         | 22.4*                      | 21.8*                               | 2.7*                  | 3.9*                  | 149*           | 20.6*                       |
| GMS 126              | 12.3                         | 28.4                       | 27.7                                | 3.2                   | 4.2                   | 145            | 24.0                        |
| GMS 145              | 13.0*                        | 17.9*                      | 16.6*                               | 2.6*                  | 4.4*                  | 117            | 20.0*                       |
| GMS 255              | 13.0                         | 16.8*                      | 15.7*                               | 3.5*                  | 6.1*                  | 92*            | 25.2                        |
| GMS 333              | 12.5                         | 14.6*                      | 14.0*                               | 2.9                   | 4.1                   | 107*           | 17.2*                       |
| GMS 339              | 13.1*                        | 22.1*                      | 20.5*                               | 3.1                   | 4.2                   | 112            | 21.3*                       |
| GMS 366              | 11.3*                        | 33.4*                      | 35.6*                               | 3.0                   | 3.9*                  | 162*           | 23.5                        |
| GMS 417              | 12.2                         | 30.2                       | 30.0                                | 3.0                   | 4.1                   | 149*           | 22.9                        |
| GMS 423              | 14.1*                        | 20.8*                      | 17.8*                               | 3.0                   | 4.5                   | 138            | 17.6*                       |
| GMS 434              | 12.3                         | 21.5*                      | 21.0                                | 2.5*                  | 3.8*                  | 135            | 20.7*                       |
| GMS 473              | 12.0                         | 19.2*                      | 19.2*                               | 2.5*                  | 4.7*                  | 115            | 20.3*                       |
| GMS 602              | 12.0                         | 19.9*                      | 19.9*                               | 3.1                   | 4.2                   | 140            | 19.1*                       |
| GMS 746              | 12.1                         | 21.5*                      | 21.3*                               | 2.4*                  | 4.0                   | 136            | 21.3*                       |
| GMS 766              | 12.8                         | 15.1*                      | 14.1*                               | 2.6*                  | 3.8                   | 106*           | 18.4*                       |
| GMS 843              | 11.3*                        | 19.0*                      | 20.0*                               | 2.3*                  | 4.1                   | 129            | 20.0*                       |
| <b>First Ratoon</b>  |                              |                            |                                     |                       |                       |                |                             |
| <b>Goldfinger</b>    | <b>11.1</b>                  | <b>40.6</b>                | <b>44.9</b>                         | <b>3.6</b>            | <b>4.0</b>            | <b>153</b>     | <b>24.4</b>                 |
| GMS 144              | 10.5                         | 30.4*                      | 34.9*                               | 3.3*                  | 3.9                   | 158            | 21.8*                       |
| GMS 211              | 13.0                         | 28.9*                      | 26.9*                               | 3.6                   | 4.1                   | 150            | 19.8*                       |
| GMS 521              | 10.3                         | 33.5*                      | 39.2                                | 3.5                   | 3.8                   | 158            | 22.3*                       |
| GMS 544              | 10.4                         | 31.4*                      | 36.6*                               | 3.5                   | 3.9                   | 151            | 21.6*                       |
| GMS 903              | 10.2                         | 42.2                       | 49.8                                | 3.3*                  | 3.6*                  | 182*           | 24.0                        |
| GMS 119              | 10.4                         | 35.7                       | 41.2                                | 3.2*                  | 3.4*                  | 175            | 23.0*                       |
| GMS 126              | 10.8                         | 47.2*                      | 53.0*                               | 3.9                   | 3.8                   | 180*           | 25.0                        |
| GMS 145              | 10.1                         | 28.6*                      | 34.1*                               | 3.4*                  | 4.4*                  | 122*           | 22.6*                       |
| GMS 255              | 10.0                         | 22.3*                      | 26.9*                               | 4.6*                  | 5.8*                  | 107*           | 27.3*                       |
| GMS 333              | 11.5                         | 21.3*                      | 22.4*                               | 3.4*                  | 3.9                   | 136            | 18.0*                       |
| GMS 339              | 10.8                         | 37.9                       | 42.1                                | 3.7                   | 3.8                   | 158            | 21.7*                       |
| GMS 366              | 9.8                          | 38.4                       | 47.0                                | 3.5                   | 3.8                   | 154            | 25.5                        |
| GMS 417              | 9.9                          | 43.5                       | 52.8*                               | 3.6                   | 3.7*                  | 170            | 25.6                        |
| GMS 423              | 11.8                         | 24.5*                      | 25.1*                               | 3.7                   | 4.1                   | 140            | 18.5*                       |
| GMS 434              | 9.6                          | 34.3*                      | 42.8                                | 3.1*                  | 3.5*                  | 173            | 23.5                        |
| GMS 473              | 9.6                          | 28.5*                      | 35.6                                | 3.4                   | 4.7*                  | 149            | 22.0*                       |
| GMS 602              | 11.4                         | 33.2*                      | 35.3                                | 3.6                   | 3.8                   | 157            | 21.5*                       |
| GMS 746              | 10.6                         | 31.9*                      | 36.2*                               | 3.0*                  | 3.7*                  | 165            | 22.6*                       |
| GMS 766              | 11.4                         | 23.1*                      | 24.7*                               | 3.5                   | 3.7*                  | 146            | 19.0*                       |
| GMS 843              | 9.3                          | 24.6*                      | 31.6*                               | 2.8*                  | 3.9                   | 140            | 22.6*                       |
| <b>Second Ratoon</b> |                              |                            |                                     |                       |                       |                |                             |
| <b>Goldfinger</b>    | <b>21.2</b>                  | <b>39.5</b>                | <b>46.6</b>                         | <b>4.2</b>            | <b>4.1</b>            | <b>180</b>     | <b>24.3</b>                 |
| GMS 144              | 20.4                         | 34.9                       | 38.6*                               | 4.0                   | 4.2                   | 208            | 21.6*                       |
| GMS 211              | 24.1*                        | 21.8*                      | 26.2*                               | 4.1                   | 4.4*                  | 157            | 17.0*                       |
| GMS 521              | 19.9                         | 33.7*                      | 40.9                                | 4.0                   | 4.1                   | 196            | 20.3*                       |

|         |       |       |       |      |      |      |       |
|---------|-------|-------|-------|------|------|------|-------|
| GMS 544 | 20.4  | 34.4  | 39.2* | 4.0  | 4.3  | 186  | 21.5* |
| GMS 903 | 20.2  | 38.6  | 48.5  | 3.8* | 3.9  | 222* | 22.1* |
| GMS 119 | 20.5  | 32.9* | 40.1  | 3.6* | 3.9* | 188  | 21.5* |
| GMS 126 | 21.2  | 39.6  | 49.0  | 4.2  | 4.1  | 184  | 24.1  |
| GMS 145 | 19.7* | 25.7* | 33.0* | 3.6* | 4.3  | 138* | 22.0* |
| GMS 255 | n.a.  | n.a.  | n.a.  | n.a. | n.a. | n.a. | n.a.  |
| GMS 333 | 22.9* | 18.4* | 22.3* | 3.6* | 3.9  | 135* | 17.7* |
| GMS 339 | 20.8  | 33.7* | 42.1  | 4.2  | 3.9  | 170  | 21.8* |
| GMS 366 | 19.6* | 37.6  | 48.5  | 4.0  | 4.1  | 186  | 24.2  |
| GMS 417 | 19.9  | 42.8  | 52.4  | 4.1  | 4.0  | 196  | 24.0  |
| GMS 423 | 22.9* | 22.7* | 25.2* | 4.1  | 4.1  | 150  | 18.1* |
| GMS 434 | 20.0  | 30.9* | 38.8* | 3.5* | 4.0  | 197  | 20.3* |
| GMS 473 | 19.2* | 26.7* | 34.8* | 4.1  | 5.3* | 180  | 21.3* |
| GMS 602 | 21.6  | 26.9* | 33.0* | 3.9  | 3.9  | 158  | 19.4* |
| GMS 746 | 21.7  | 29.8* | 36.3* | 3.4* | 4.0  | 214  | 21.4* |
| GMS 766 | 22.4  | 23.7* | 26.8* | 3.9  | 4.0  | 136* | 19.6* |
| GMS 843 | 19.4* | 24.6* | 31.0* | 3.0* | 4.3  | 150  | 22.1* |

<sup>1</sup> For the first and second ratoon this is calculated from the date of nurse suckering. <sup>2</sup> Excludes stalk weight. <sup>3</sup> Bunch wt/12 months for Plant Crop = (bunch weight [kg]/time from planting to harvest [days]) × 365. <sup>4</sup> Bunch wt/12 months for First Ratoon = (bunch weight [kg]/time from nurse suckering to harvest [days]) × 365. <sup>5</sup> Bunch wt/12 months for Second Ratoon = ((first ratoon bunch weight [kg] + second ratoon bunch weight [kg])/ time from nurse suckering to second ratoon harvest [days]) × 365. \* Significantly different to Goldfinger ( $\alpha = 0.05$ ).

**Table S4.** The 5-point Just About Right (JAR) responses from consumers across the two evaluations dates, December 2021 and April 2022, expressed as a percentage of respondents (%).

|                              | GMS<br>144 | GMS<br>211 | GMS<br>521 | GMS<br>544 | GMS<br>903 | Goldfinger | Lady<br>Finger | Cavendish |
|------------------------------|------------|------------|------------|------------|------------|------------|----------------|-----------|
| <b>External Colour (%)</b>   |            |            |            |            |            |            |                |           |
| Much too brown               | 2          | 4          | 0          | 1          | 5          | 1          | 4              | 1         |
| Somewhat too brown           | 19         | 32         | 24         | 12         | 23         | 15         | 32             | 1         |
| Just Right (yellow)          | 55         | 49         | 63         | 71         | 54         | 64         | 55             | 79        |
| Somewhat too pale yellow     | 23         | 13         | 12         | 16         | 16         | 21         | 9              | 18        |
| Much too pale yellow         | 2          | 1          | 1          | 0          | 2          | 0          | 0              | 1         |
| <b>Ripeness (%)</b>          |            |            |            |            |            |            |                |           |
| Very overripe                | 2          | 3          | 0          | 0          | 3          | 1          | 3              | 0         |
| Somewhat overripe            | 37         | 38         | 26         | 18         | 26         | 22         | 33             | 6         |
| Just Right                   | 52         | 56         | 65         | 72         | 63         | 71         | 56             | 79        |
| Somewhat underripe           | 10         | 3          | 9          | 10         | 7          | 6          | 6              | 14        |
| Very underripe               | 0          | 1          | 0          | 0          | 0          | 0          | 1              | 0         |
| <b>Fruit length (%)</b>      |            |            |            |            |            |            |                |           |
| Much too big                 | 2          | 0          | 2          | 3          | 3          | 13         | 0              | 1         |
| Somewhat too big             | 20         | 3          | 8          | 17         | 13         | 33         | 1              | 14        |
| Just Right                   | 66         | 55         | 72         | 67         | 76         | 52         | 45             | 65        |
| Somewhat too small           | 12         | 36         | 17         | 11         | 7          | 2          | 45             | 19        |
| Much too small               | 0          | 6          | 1          | 2          | 0          | 0          | 9              | 1         |
| <b>Fruit outer width (%)</b> |            |            |            |            |            |            |                |           |
| Much too thick               | 3          | 7          | 5          | 13         | 2          | 9          | 1              | 0         |
| Somewhat too thick           | 41         | 46         | 48         | 48         | 28         | 38         | 28             | 2         |
| Just Right                   | 53         | 45         | 44         | 39         | 63         | 52         | 66             | 83        |
| Somewhat too thin            | 2          | 2          | 2          | 1          | 7          | 1          | 5              | 15        |
| Much too thin                | 0          | 1          | 0          | 0          | 0          | 0          | 0              | 0         |
| <b>Fruit shape (%)</b>       |            |            |            |            |            |            |                |           |
| Much too curved              | 0          | 0          | 1          | 0          | 0          | 1          | 0              | 2         |
| Somewhat too curved          | 9          | 6          | 5          | 12         | 5          | 5          | 4              | 10        |
| Just Right                   | 65         | 52         | 53         | 54         | 68         | 65         | 59             | 88        |
| Somewhat too straight        | 20         | 34         | 34         | 26         | 23         | 21         | 32             | 1         |
| Much too straight            | 6          | 8          | 7          | 7          | 4          | 7          | 5              | 0         |
| <b>Peelability (%)</b>       |            |            |            |            |            |            |                |           |
| Very Easy                    | 33         | 37         | 27         | 19         | 33         | 36         | 46             | 34        |
| Easy                         | 45         | 47         | 35         | 30         | 36         | 46         | 43             | 33        |
| Moderate                     | 19         | 12         | 27         | 30         | 21         | 15         | 9              | 25        |
| Difficult                    | 3          | 4          | 8          | 19         | 9          | 3          | 2              | 6         |
| Very difficult               | 0          | 0          | 2          | 3          | 1          | 0          | 1              | 2         |
| <b>Peel thickness (%)</b>    |            |            |            |            |            |            |                |           |
| Much too thick               | 0          | 1          | 2          | 5          | 1          | 4          | 0              | 0         |
| Somewhat too thick           | 17         | 14         | 30         | 37         | 18         | 29         | 8              | 10        |
| Just Right                   | 75         | 71         | 68         | 56         | 74         | 65         | 70             | 83        |

|                                   |    |    |    |    |    |    |    |    |
|-----------------------------------|----|----|----|----|----|----|----|----|
| Somewhat too thin                 | 7  | 13 | 1  | 2  | 7  | 1  | 19 | 7  |
| Much too thin                     | 0  | 0  | 0  | 0  | 1  | 0  | 3  | 0  |
| <b>Internal colour (%)</b>        |    |    |    |    |    |    |    |    |
| Much too dark                     | 1  | 2  | 0  | 1  | 2  | 0  | 1  | 1  |
| Somewhat too dark                 | 5  | 8  | 2  | 4  | 2  | 4  | 6  | 0  |
| Just Right                        | 80 | 72 | 84 | 84 | 85 | 78 | 80 | 90 |
| Somewhat too pale                 | 14 | 18 | 13 | 11 | 9  | 18 | 13 | 9  |
| Much too pale                     | 0  | 0  | 1  | 1  | 2  | 0  | 0  | 0  |
| <b>Fruit inner width (%)</b>      |    |    |    |    |    |    |    |    |
| Much too thick                    | 1  | 5  | 5  | 11 | 2  | 6  | 0  | 0  |
| Somewhat too thick                | 30 | 48 | 32 | 43 | 22 | 33 | 24 | 2  |
| Just Right                        | 64 | 43 | 61 | 44 | 61 | 60 | 71 | 86 |
| Somewhat too thin                 | 5  | 4  | 2  | 2  | 14 | 1  | 5  | 13 |
| Much too thin                     | 0  | 0  | 0  | 0  | 2  | 0  | 0  | 0  |
| <b>Aroma (%)</b>                  |    |    |    |    |    |    |    |    |
| Overripe banana                   | 5  | 6  | 1  | 3  | 3  | 1  | 4  | 2  |
| Sweet, characteristic ripe banana | 35 | 31 | 48 | 38 | 34 | 31 | 27 | 51 |
| Sweet with a hint of green banana | 41 | 33 | 37 | 40 | 46 | 45 | 38 | 30 |
| Green banana                      | 16 | 27 | 13 | 16 | 16 | 21 | 28 | 14 |
| Intense green banana              | 2  | 3  | 2  | 2  | 1  | 1  | 2  | 3  |
| <b>Firmness (%)</b>               |    |    |    |    |    |    |    |    |
| Much too firm                     | 0  | 0  | 0  | 1  | 2  | 0  | 0  | 1  |
| Somewhat too firm                 | 3  | 8  | 16 | 13 | 10 | 4  | 15 | 13 |
| Just Right                        | 63 | 54 | 72 | 71 | 70 | 63 | 78 | 80 |
| Somewhat too soft                 | 30 | 31 | 10 | 13 | 17 | 30 | 6  | 6  |
| Much too soft                     | 4  | 6  | 2  | 2  | 1  | 2  | 1  | 0  |
| <b>Moistness (%)</b>              |    |    |    |    |    |    |    |    |
| Much too moist                    | 0  | 3  | 0  | 0  | 0  | 1  | 0  | 1  |
| Somewhat too moist                | 12 | 27 | 7  | 7  | 5  | 13 | 5  | 4  |
| Just Right                        | 78 | 68 | 83 | 82 | 84 | 62 | 82 | 69 |
| Somewhat too dry                  | 10 | 2  | 11 | 11 | 8  | 22 | 13 | 26 |
| Much too dry                      | 0  | 1  | 0  | 0  | 2  | 1  | 0  | 0  |
| <b>Sweetness (%)</b>              |    |    |    |    |    |    |    |    |
| Much too strong                   | 1  | 1  | 0  | 0  | 1  | 1  | 0  | 0  |
| Somewhat too strong               | 7  | 16 | 20 | 15 | 7  | 6  | 10 | 3  |
| Just Right                        | 63 | 48 | 57 | 65 | 66 | 42 | 67 | 62 |
| Somewhat too weak                 | 26 | 28 | 21 | 16 | 24 | 44 | 22 | 31 |
| Much too weak                     | 3  | 7  | 2  | 4  | 2  | 7  | 1  | 4  |
